# Supplementary material for: A bacterial TIR-based immune system senses viral capsids to initiate defense
Source: PubMed Central journal article supplement (PMC11312562; doi:10.1101/2024.07.29.605636), 2024-07-29
Supplement: NIHPP2024.07.29.605636V1-supplement-1.pdf [file NIHPP2024.07.29.605636V1-supplement-1.pdf]

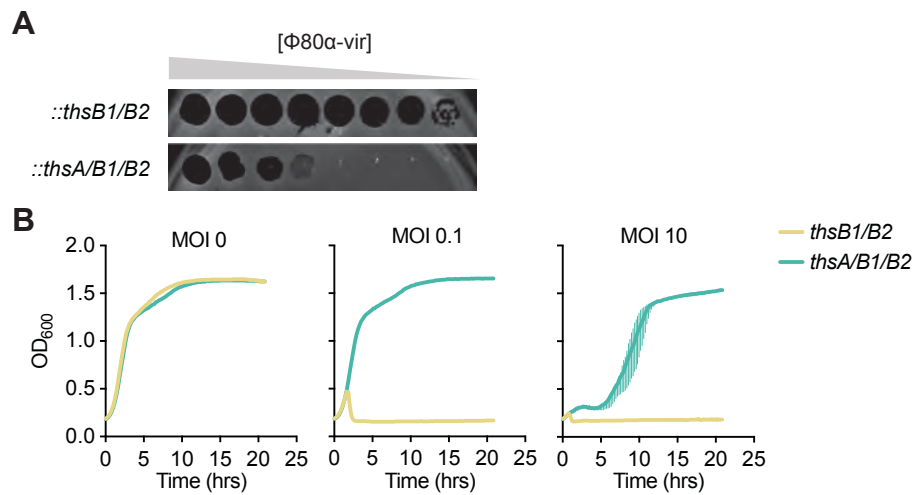

**Figure S1. Roberts, Fishman *et al.***

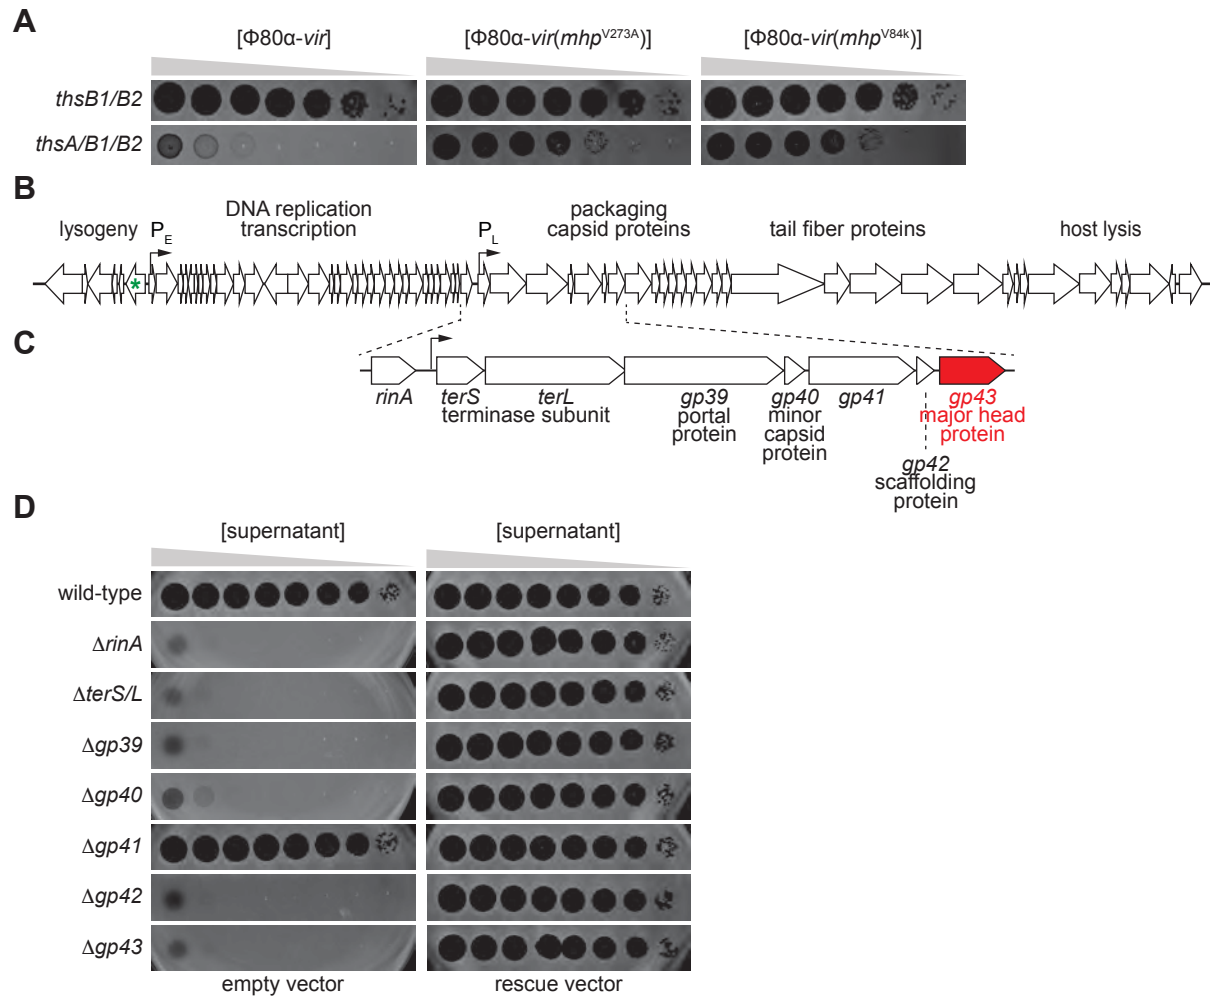

**Figure S2. Roberts, Fishman *et al.***

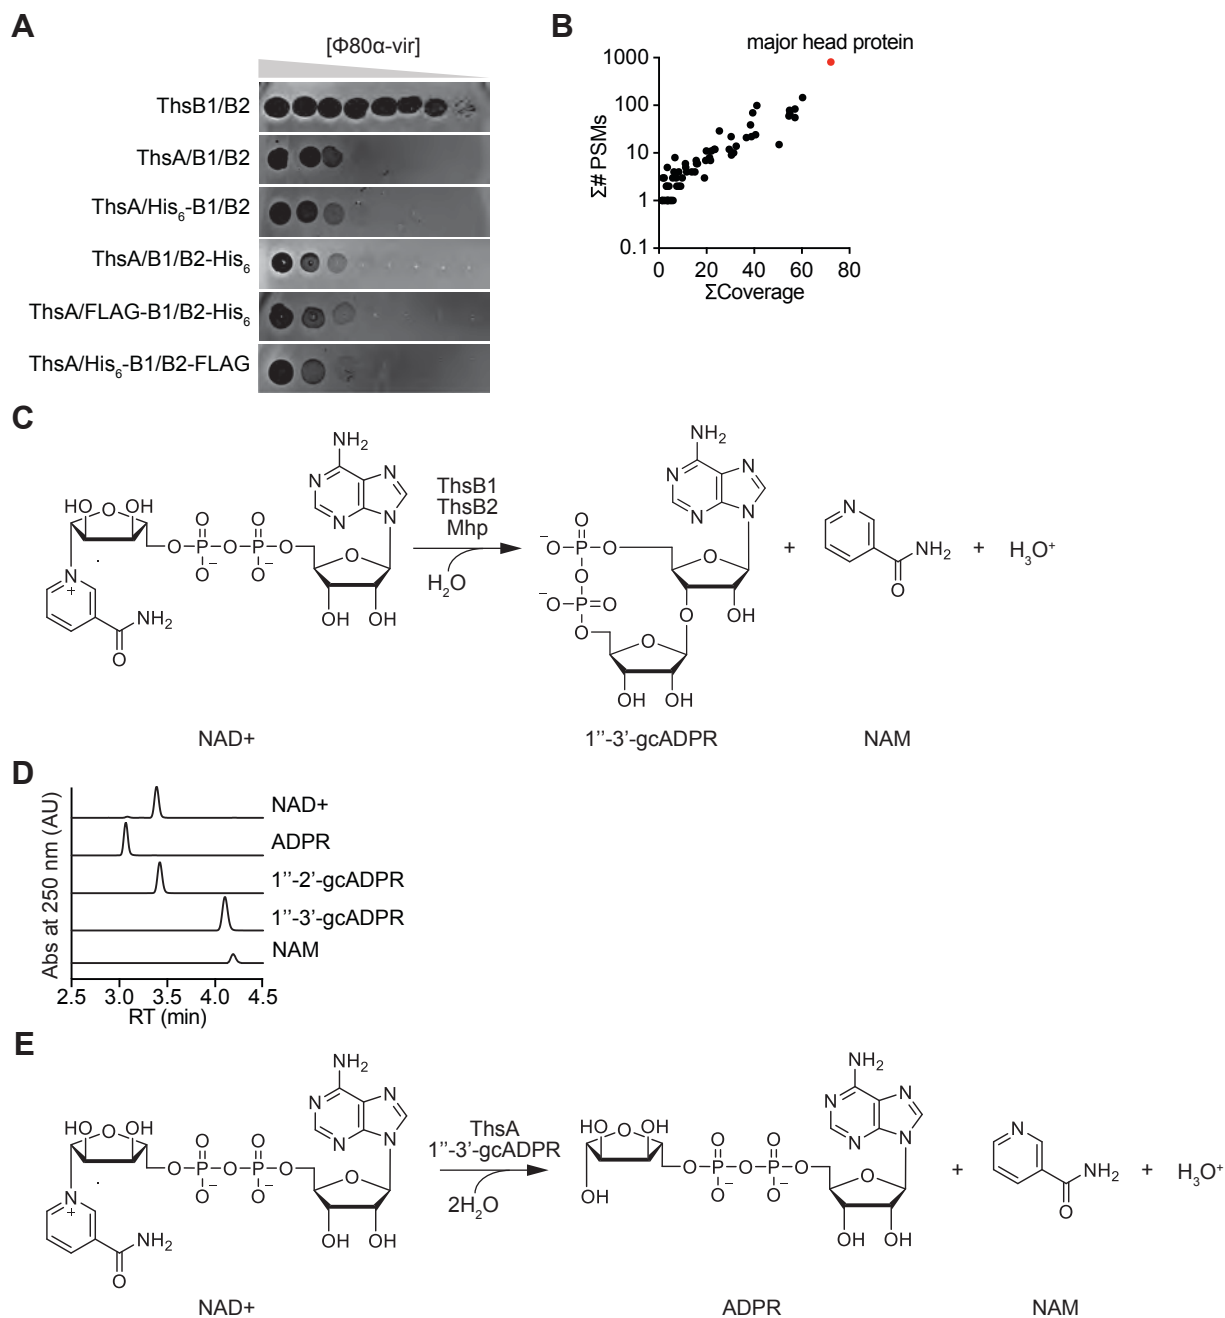

**Figure S3. Roberts, Fishman *et al.***

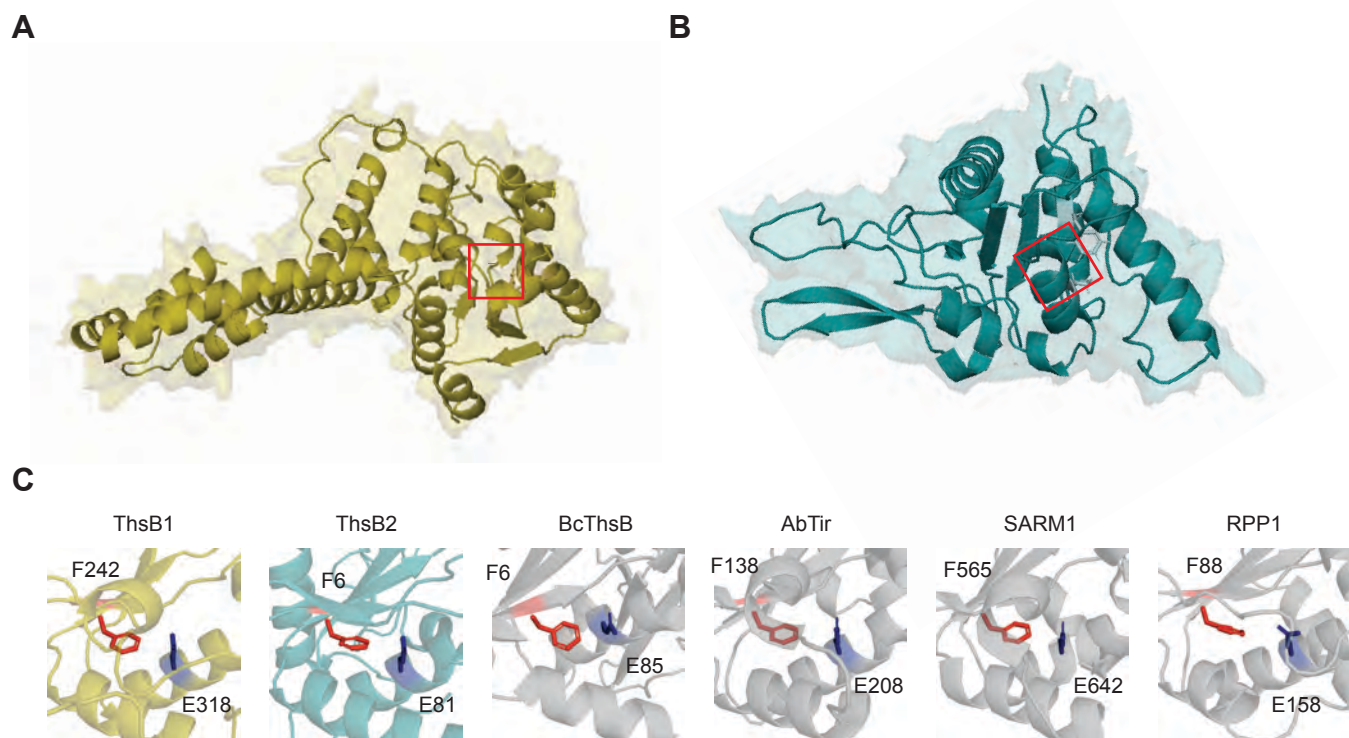

**Figure S4. Roberts, Fishman *et al.***

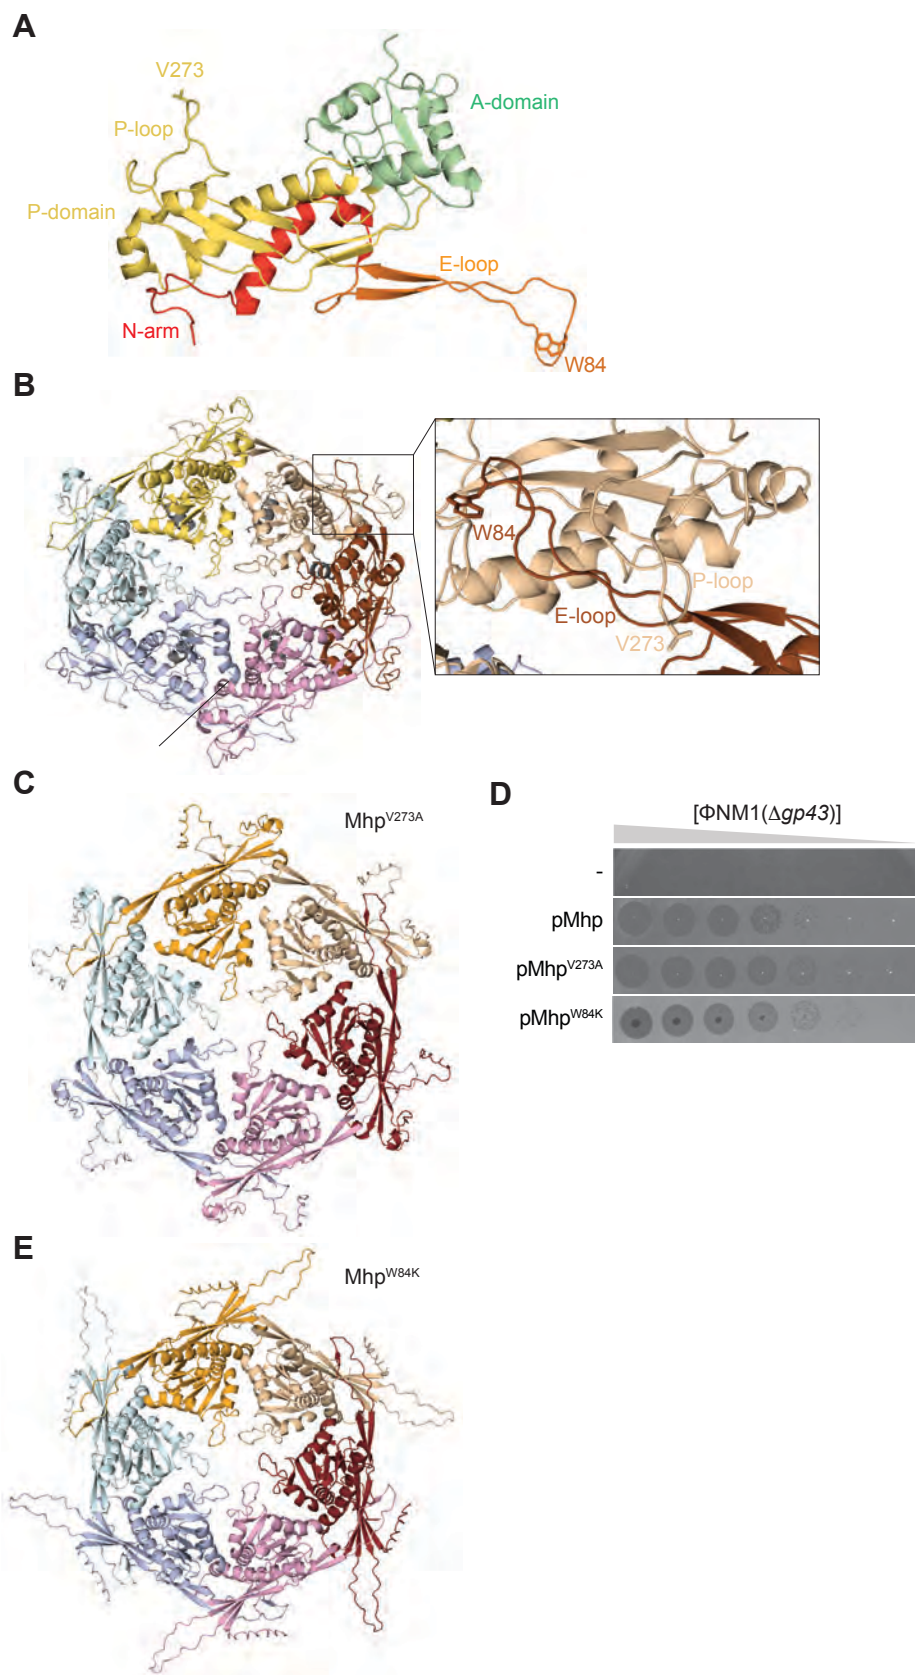

**Figure S5. Roberts, Fishman *et al.***

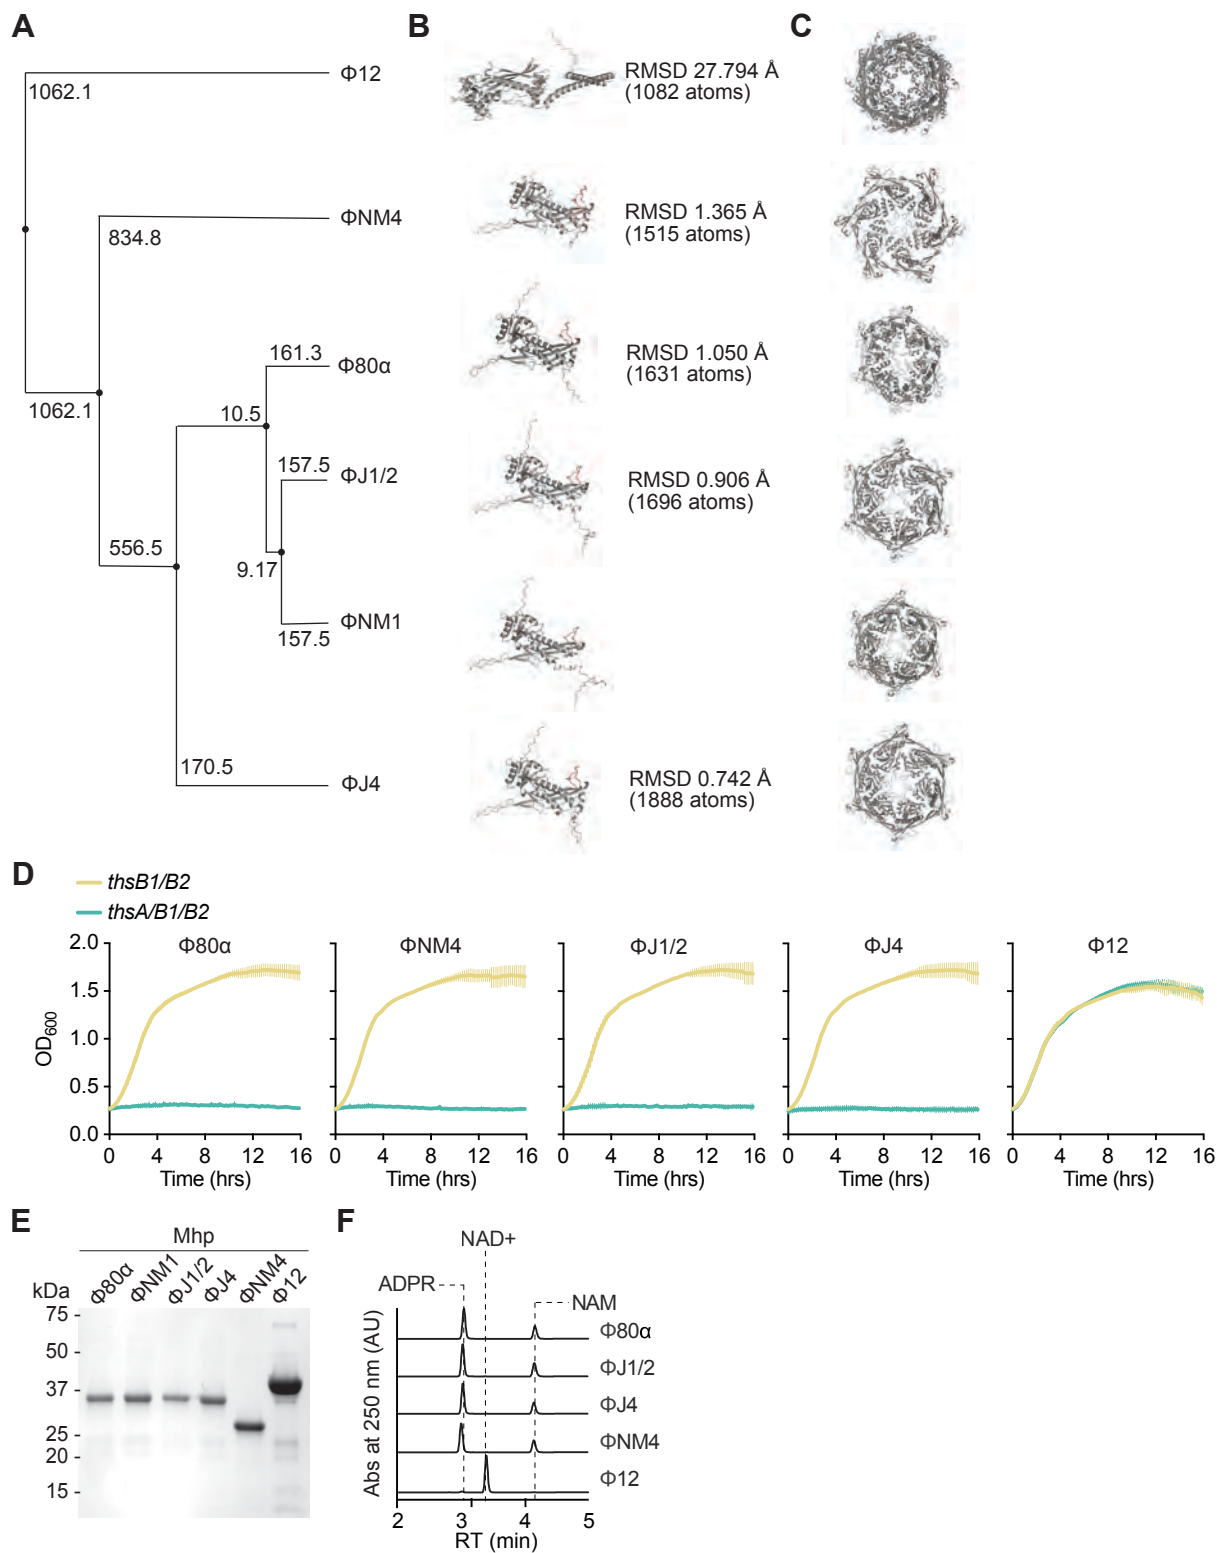

**Figure S6. Roberts, Fishman *et al.***

## SUPPLEMENTARY METHODS TABLES.

**Supplementary Methods Table 1.** Bacterial strains used in this study.

| <b>Species</b>   | <b>Strain</b> | <b>Genotype</b>                           | <b>Origin</b>                         |
|------------------|---------------|-------------------------------------------|---------------------------------------|
| <i>S. aureus</i> | RN4220        | Wild type                                 | Kreiswerth et al., Nature (1983)      |
| <i>S. aureus</i> | RN4220        | :: $\Phi$ NM1                             | Goldberg et al., Nature (2014)        |
| <i>S. aureus</i> | RN4220        | :: $\Phi$ NM1 $\Delta$ DnaC               | Cre-loxP Recombineering (see methods) |
| <i>S. aureus</i> | RN4220        | :: $\Phi$ NM1 $\Delta$ RinA               | Cre-loxP Recombineering (see methods) |
| <i>S. aureus</i> | RN4220        | :: $\Phi$ NM1 $\Delta$ TerS               | Cre-loxP Recombineering (see methods) |
| <i>S. aureus</i> | RN4220        | :: $\Phi$ NM1 $\Delta$ TerL               | Cre-loxP Recombineering (see methods) |
| <i>S. aureus</i> | RN4220        | :: $\Phi$ NM1 $\Delta$ Portal             | Cre-loxP Recombineering (see methods) |
| <i>S. aureus</i> | RN4220        | :: $\Phi$ NM1 $\Delta$ Gp40               | Cre-loxP Recombineering (see methods) |
| <i>S. aureus</i> | RN4220        | :: $\Phi$ NM1 $\Delta$ Gp41               | Cre-loxP Recombineering (see methods) |
| <i>S. aureus</i> | RN4220        | :: $\Phi$ NM1 $\Delta$ Gp42               | Cre-loxP Recombineering (see methods) |
| <i>S. aureus</i> | RN4220        | :: $\Phi$ NM1 $\Delta$ Major Head         | Cre-loxP Recombineering (see methods) |
| <i>S. aureus</i> | RN4220        | :: $\Phi$ 80 $\alpha$ $\Delta$ Major Head | Cre-loxP Recombineering (see methods) |
| <i>S. aureus</i> | RN4220        | ::Sau-Thoeris-ermR                        | Chromosomal integration (see methods) |
| <i>S. aureus</i> | RN4220        | ::Sau-ThsB1-B2-ermR                       | Chromosomal integration (see methods) |

## Supplementary Methods Table 2. Phages used in this study.

| Phage                            | Host             | Genotype                                 | Origin                                                                             |
|----------------------------------|------------------|------------------------------------------|------------------------------------------------------------------------------------|
| Φ80α-vir                         | <i>S. aureus</i> | Wild type                                | Banh and Roberts et al., Nature (2023)                                             |
| Φ80α-vir <sup>GFP</sup>          | <i>S. aureus</i> | Wild type                                | Banh and Roberts et al., Nature (2023)                                             |
| Φ80α-vir(gp47 <sup>V273A</sup> ) | <i>S. aureus</i> | Major head (gp47) V273>A (T818>C)        | This study; isolated from screen for Sau-Thoeris escapers                          |
| Φ80α-vir(gp47 <sup>W84K</sup> )  | <i>S. aureus</i> | Major head (gp47) W84>K (TGG249-251>AAA) | This study; engineered by recombination using pCR186 and selected for using pCR187 |
| ΦJ1                              | <i>S. aureus</i> | Wild type                                | Banh and Roberts et al., Nature (2023)                                             |
| ΦJ2                              | <i>S. aureus</i> | Wild type                                | Banh and Roberts et al., Nature (2023)                                             |
| ΦJ4                              | <i>S. aureus</i> | Wild type                                | Banh and Roberts et al., Nature (2023)                                             |
| ΦNM1γ6                           | <i>S. aureus</i> | Wild type                                | Goldberg et al., Nature (2014)                                                     |
| ΦNM4γ4                           | <i>S. aureus</i> | Wild type                                | Heler et al., Nature (2015)                                                        |
| Φ12γ3                            | <i>S. aureus</i> | Wild type                                | Modell et al., Nature (2017)                                                       |



### Supplementary Methods Table 3. Plasmids used in this study.

| Plasmid | Description                                                                                                                                                  | Source            | Construction Notes                                                                                     |
|---------|--------------------------------------------------------------------------------------------------------------------------------------------------------------|-------------------|--------------------------------------------------------------------------------------------------------|
| pPM300  | Recombineering genes from phage $\phi$ 11 under the control of an IPTG-inducible promoter and cre-recombinase under the control of an aTc-inducible promoter | Banh et al., 2023 |                                                                                                        |
| pDVB223 | Thoeris operon from <i>S. aureus</i> 08BA02176, IPTG-inducible pE194-based vector for recombinant protein expression                                         | This study        | Gibson assembly: oDVB796+oDVB797 ( <i>S. aureus</i> 08BA02176 template) oDVB_ + oDVB_ (pE194 template) |
| pCF8    | ThsA+ThsB1, IPTG-inducible pE194-based vector for recombinant protein expression                                                                             | This study        | Gibson assembly: oCF.36+oCF.37 (pDVB223 template)                                                      |
| pCF9    | ThsA+ThsB2, IPTG-inducible pE194-based vector for recombinant protein expression                                                                             | This study        | Gibson assembly: oCF.38+oCF.39 (pDVB223 template)                                                      |
| pCF10   | ThsA, IPTG-inducible pE194-based vector for recombinant protein expression                                                                                   | This study        | Gibson assembly: oCF.40+oCF.41 (pDVB223 template)                                                      |
| pCF11   | ThsB1+ThsB2 IPTG-inducible pE194-based vector for recombinant protein expression                                                                             | This study        | Gibson assembly: oCF.42+oCF.43 (pDVB223 template)                                                      |
| pCF34   | His6-ThsA+ThsB1+ThsB2, IPTG-inducible pE194-based vector for recombinant protein expression and purification of ThsA                                         | This study        | Gibson assembly: oCF.70+oCF.91 oCF.86+oCF.90 (pDVB223 template)                                        |
| pCF35   | ThsA+His6-ThsB1+ThsB2, IPTG-inducible pE194-based vector for recombinant protein expression and purification of ThsB1                                        | This study        | Gibson assembly: oCF.72+oCF.91 oCF.73+oCF.90 (pDVB223 template)                                        |
| pCF41   | gp43 (major head) from $\Phi$ NM1 $\gamma$ 6 with escape mutation (V273A), IPTG-                                                                             | This study        | Gibson assembly: oCF.84+oCF.85 (pCR176 template)                                                       |

|       |                                                                                                                                   |            |                                                                                                            |
|-------|-----------------------------------------------------------------------------------------------------------------------------------|------------|------------------------------------------------------------------------------------------------------------|
|       | inducible pC194-based vector for recombinant protein expression                                                                   |            |                                                                                                            |
| pCF45 | N315 hypothetical protein from $\Phi$ 12 $\gamma$ 3, IPTG-inducible pC194-based vector for recombinant protein expression         | This study | Gibson assembly:<br>oCF.98+oCF.99<br>( $\Phi$ 12 $\gamma$ 3 template)<br>oCF.97+oCF100<br>(pC194 template) |
| pCF46 | His6-N315 hypothetical protein from $\Phi$ 12 $\gamma$ 3, IPTG-inducible pC194-based vector for recombinant protein expression    | This study | Gibson assembly:<br>oCF.86+oCF.101<br>(pCF.45 template)                                                    |
| pCF47 | ThsB1(F242A)+ThsB2 IPTG-inducible pE194-based vector for recombinant protein expression                                           | This study | Gibson Assembly:<br>oCF.102+oCF.103<br>(pCF.11 template)                                                   |
| pCF48 | ThsB1(E318Q)+ThsB2 IPTG-inducible pE194-based vector for recombinant protein expression                                           | This study | Gibson Assembly:<br>oCF.104+oCF.105<br>(pCF.11 template)                                                   |
| pCF49 | ThsB1+ThsB2(F6A) IPTG-inducible pE194-based vector for recombinant protein expression                                             | This study | Gibson Assembly:<br>oCF.106+oCF.107<br>(pCF.11 template)                                                   |
| pCF50 | ThsB1+ThsB2(E81Q) IPTG-inducible pE194-based vector for recombinant protein expression                                            | This study | Gibson Assembly:<br>oCF.108+oCF.109<br>(pCF.11 template)                                                   |
| pCF51 | ThsA+ThsB1+ThsB2-His6, IPTG-inducible pE194-based vector for recombinant protein expression and purification of ThsB2             | This study | Gibson Assembly:<br>oCF.110+oCF.111<br>(pDVB223 template)                                                  |
| pCF52 | His6-ThsB1+ThsB2-3xFlag, IPTG-inducible pE194-based vector for recombinant protein expression and purification of ThsB1 and ThsB2 | This study | Gibson Assembly:<br>oCF.112 + oCF.114<br>oCF.72 + oCF.113<br>oCF.86 + oCF.115<br>(pCF.11 template)         |
| pCF53 | 3xFlag-ThsB1+ThsB2-His6, IPTG-inducible pE194-based vector for recombinant protein expression and                                 | This study | oCF.112 + oCF.117<br>oCF.78 + oCF.113<br>oCF.87 + oCF.116<br>(pCF.11 template)                             |

|       |                                                                                                                        |            |                                                     |
|-------|------------------------------------------------------------------------------------------------------------------------|------------|-----------------------------------------------------|
|       | purification of ThsB1 and ThsB2                                                                                        |            |                                                     |
| pCF55 | ThsA+ThsB1(F242A)+ThsB2 IPTG-inducible pE194-based vector for recombinant protein expression                           | This study | Gibson Assembly: oCF.102+oCF.103 (pDVB223 template) |
| pCF56 | ThsA+ThsB1(E318Q)+ThsB2 IPTG-inducible pE194-based vector for recombinant protein expression                           | This study | Gibson Assembly: oCF.104+oCF.105 (pDVB223 template) |
| pCF57 | ThsA+ThsB1+ThsB2(F6A) IPTG-inducible pE194-based vector for recombinant protein expression                             | This study | Gibson Assembly: oCF.106+oCF.107 (pDVB223 template) |
| pCF58 | ThsA+ThsB1+ThsB2(E81Q) IPTG-inducible pE194-based vector for recombinant protein expression                            | This study | Gibson Assembly: oCF.108+oCF.109 (pDVB223 template) |
| pCF60 | ThsB1+ThsB2 IPTG-inducible pE194-based vector for recombinant protein expression                                       | This study | Gibson assembly: oCF.110+oCF.111 (pCF.11 template)  |
| pCF64 | Gp43(W84K) (Major Head) of $\Phi$ NM1 $\gamma$ 6, IPTG-inducible pC194-based vector for recombinant protein expression | This study | Gibson assembly: oCF.126+oCF.127 (pCR176 template)  |
| pCF69 | His-ThsB1 IPTG-inducible pE194-based vector for recombinant protein expression                                         | This study | Gibson Assembly: oCF.36+oCF.37 (pCF.52 template)    |
| pCF70 | ThsB2-His IPTG-inducible pE194-based vector for recombinant protein expression                                         | This study | Gibson Assembly: oCF.136+oCF.137 (pCF.53 template)  |
| pCF80 | ThsA+His6-ThsB1+ThsB2-3xFLAG, IPTG-inducible pE194-based vector for recombinant protein expression                     | This study | Gibson Assembly oCF.114+oCF.115 (template pCF.35)   |
| pCF81 | ThsA+3xFLAG-ThsB1+ThsB2-His6, IPTG-inducible pE194-based vector for recombinant protein expression                     | This study | Gibson Assembly oCF.78+oCF.160 (template pCF.51)    |

|        |                                                                                                                                                |            |                                                                                                       |
|--------|------------------------------------------------------------------------------------------------------------------------------------------------|------------|-------------------------------------------------------------------------------------------------------|
| pCR173 | terS-Gp43 (full packaging and structure operon) of $\Phi$ NM1 $\gamma$ 6, IPTG-inducible pC194-based vector for recombinant protein expression | This study | Gibson Assembly:<br>oCR499+oCR500 ( $\Phi$ NM1 $\gamma$ 6 template)<br>oCR497+oCR498 (pC194 template) |
| pCR174 | Portal-Gp43 of $\Phi$ NM1 $\gamma$ 6, IPTG-inducible pC194-based vector for recombinant protein expression                                     | This study | Gibson Assembly:<br>oCR501+oCR500 ( $\Phi$ NM1 $\gamma$ 6 template)<br>oCR497+oCR498 (pC194 template) |
| pCR175 | Gp40-Gp43 of $\Phi$ NM1 $\gamma$ 6, IPTG-inducible pC194-based vector for recombinant protein expression                                       | This study | Gibson Assembly:<br>oCR502+oCR500 ( $\Phi$ NM1 $\gamma$ 6 template)<br>oCR497+oCR498 (pC194 template) |
| pCR176 | Gp43 (Major Head) of $\Phi$ NM1 $\gamma$ 6, IPTG-inducible pC194-based vector for recombinant protein expression                               | This study | Gibson Assembly:<br>oCR503+oCR500 ( $\Phi$ NM1 $\gamma$ 6 template)<br>oCR497+oCR498 (pC194 template) |
| pCR177 | terL (large terminase subunit) of $\Phi$ NM1 $\gamma$ 6, IPTG-inducible pC194-based vector for recombinant protein expression                  | This study | Gibson Assembly:<br>oCR504+oCR505 ( $\Phi$ NM1 $\gamma$ 6 template)<br>oCR497+oCR498 (pC194 template) |
| pCR178 | terS-terL of $\Phi$ NM1 $\gamma$ 6, IPTG-inducible pC194-based vector for recombinant protein expression                                       | This study | Gibson Assembly:<br>oCR499+oCR505 ( $\Phi$ NM1 $\gamma$ 6 template)<br>oCR497+oCR498 (pC194 template) |
| pCR179 | Major Head of $\Phi$ J1/2, IPTG-inducible pC194-based vector for recombinant protein expression                                                | This study | Gibson Assembly:<br>oCR497+oCR498 (pCR176 template)<br>oCR515+oCR516 ( $\Phi$ J1/2 template)          |
| pCR180 | Major Head of $\Phi$ J4, IPTG-inducible pC194-based vector for recombinant protein expression                                                  | This study | Gibson Assembly:<br>oCR497+oCR498 (pCR176 template)<br>oCR517+oCR518 ( $\Phi$ J4 template)            |
| pCR181 | Major Head of $\Phi$ 80 $\alpha$ , IPTG-inducible pC194-based                                                                                  | This study | Gibson Assembly:<br>oCR497+oCR498                                                                     |

|        |                                                                                                                                                                                    |            |                                                                                                                                                                               |
|--------|------------------------------------------------------------------------------------------------------------------------------------------------------------------------------------|------------|-------------------------------------------------------------------------------------------------------------------------------------------------------------------------------|
|        | vector for recombinant protein expression                                                                                                                                          |            | (pCR176 template)<br>oCR519+oCR520<br>(Φ80α template)                                                                                                                         |
| pCR184 | Major Head of Φ80α with V273A, IPTG-inducible pC194-based vector for recombinant protein expression                                                                                |            | Gibson assembly:<br>oCF.84+oCF.85<br>(pCR181 template)                                                                                                                        |
| pCR185 | Major Head of Φ80α with W84K, IPTG-inducible pC194-based vector for recombinant protein expression                                                                                 |            | Gibson assembly:<br>oCF.126+oCF.127<br>(pCR181 template)                                                                                                                      |
| pCR182 | Major Head of ΦNM4, IPTG-inducible pC194-based vector for recombinant protein expression                                                                                           | This study | Gibson Assembly:<br>oCR497+oCR498<br>(pCR176 template)<br>oCR521+oCR522<br>(ΦNM4 template)                                                                                    |
| pCR183 | Major Head of Φ12, IPTG-inducible pC194-based vector for recombinant protein expression                                                                                            | This study | Gibson Assembly:<br>oCR497+oCR498<br>(pCR176 template)<br>oCR523+oCR524<br>(Φ12 template)                                                                                     |
| pCR186 | Recombination plasmid harboring <i>mhp</i> <sup>W84K</sup> gene with 500-nt upstream and downstream homology arms corresponding to Φ80α <i>gp46</i> and <i>gp48</i> , respectively | This study | Gibson Assembly:<br>oCR589+oCR590<br>(pCR176 template)<br>oCR591+oCR592<br>(Φ80α gDNA template)<br>oCR593+oCR594<br>(pCF64 template)<br>oCR595+oCR596<br>(Φ80α gDNA template) |
| pCR187 | <i>S. aureus</i> M06/0171 type II-A CRISPR-Cas system with programmed spacer targeting wild-type Φ80α- <i>vir</i>                                                                  | This study | Ligation of Bsal-digested pDVB47 (Banh et al., 2023) and annealed oCR597/oCR598                                                                                               |

|  |                                                                          |  |  |
|--|--------------------------------------------------------------------------|--|--|
|  | but not $\Phi 80\alpha\text{-vir}::mhp^{W84K}$<br>(mutation changes PAM) |  |  |
|--|--------------------------------------------------------------------------|--|--|

**Supplementary Methods Table 4.** Oligonucleotide primers used in this study.

| Primer | Sequence                                                                                                            |
|--------|---------------------------------------------------------------------------------------------------------------------|
| oCR24  | ATCAATCAAACGTTAATCCGTCTTTAAGAGATGCAACAGTCAAAAAC<br>ACAAGCCATAACTTCGTATAGCATAACATTATACGAAGTTATAGTGACA<br>TTAG        |
| oCR25  | AGCCTTGACTACTCTATTGCTGTTTGTGTTAGCGTGTACTTGTTTT<br>CATTTTGTATAACTTCGTATAATGTATGCTATACGAAGTTATTATATTT<br>ATG          |
| oCR26  | ATACAAATATAGGCGGGGAGTTTGTACCGTCTAATACATCAAAAACA<br>GAAATGGCAGTAACATAACTTCGTATAGCATAACATTATACGAAGTTAT<br>AGTGACATTAG |
| oCR27  | CGTTCAATCGCACTCTTAAACTCAAGAATTTTACCTCTTCGTATACTA<br>CAAAGATAATTAATAACTTCGTATAATGTATGCTATACGAAGTTATTAT<br>ATTTATG    |
| oCR59  | ATCTGCTTCTATTGCTAGAGGAGAACCTCAAGAGGCTTACAGTAAGA<br>AATATGACCATTTATAACTTCGTATAGCATAACATTATACGAAGTTATAG<br>TGACATTAG  |
| oCR60  | TGACGCTTTCAAAAGTTGGTGTGATTGTGTAAGTAACCTCTTTTTCC<br>ACTTCATCGTTTATAACTTCGTATAATGTATGCTATACGAAGTTATTAT<br>ATTTATG     |
| oCR63  | TTAAGAAGTGAAGAAGAAACCAGGTAAGCCGTTAGACGTACAACCTT<br>GATGAATTAGCTGATAACTTCGTATAGCATAACATTATACGAAGTTATA<br>GTGACATTAG  |
| oCR64  | TTTATCTCTTCTGATGACACTCCTACTTGATTCGCAACTCAATCCA<br>AACGCCAACATGTATAACTTCGTATAATGTATGCTATACGAAGTTATT<br>ATATTTATG     |
| oCR95  | AAATAATCATCCTCCTAAGTACAAGCTTAATTGTTATCCGCTCACAAT<br>TCCACACATTAT                                                    |
| oCR96  | GAGTGATCGTTAAATTTATACTGCAATCGGATGCGATTATTGAATAAA<br>AGATATGAGAGA                                                    |
| oCR482 | GGTGTGAAACGCGATACTTTTCTAATAATGATAGCGAACTATTGAAG<br>AGTCACATGTTTTATTGGAGTGTGTTATGCATCCCTTAACTTACTTATTA<br>AAT        |
| oCR483 | GCTAATTGACAAGGTCTCATAAATGACTCAGCAAACGATTGCAATGTA<br>TTGATACGGTTATTCTGTTTATTAAGCATTAAACCCCATGAATTATT<br>TT           |
| oCR484 | GCTAATTGACAAGGTCTCATAAATGACTCAGCAAACGATTGCAATGTA<br>TTGATACGGTTATTCTGTTTATTTATTTCTTCTACAGATATTATAATTC<br>GTTGC      |
| oCR485 | ACGACAAAACCTTAGAGTTGTTAGCAAATCGTAATCCAGCATATTACAA<br>AATTTATGCGTTATAACTTCGTATAGCATAACATTATACGAAGTTATAGT<br>GACATTAG |

|        |                                                                                                                    |
|--------|--------------------------------------------------------------------------------------------------------------------|
| oCR486 | TTTATTA AACGTTTTTCATACTTAGGGAAAACCAATTTGTCTAGTGTAG<br>CAAATTCACCTATAACTTCGTATAATGTATGCTATACGAAGTTATTATA<br>TTTATG  |
| oCR487 | GTTACTTATTAAGGTAATTTAAATTTAGATCCCGTAGAAGTTAGAAAA<br>CAAAGGAAGCATAACTTCGTATAGCATAACATTATACGAAGTTATAGT<br>GACATTAG   |
| oCR488 | CCTTCTGTTTCTCTACCTTCGCTATCAGCATAAACAGTCGGTTCTAAA<br>AACAAACACGTTAATAACTTCGTATAATGTATGCTATACGAAGTTATTAT<br>ATTTATG  |
| oCR489 | AATAATTGCTAATGTAGTTATTAGAGGTCGACATCCTAATGAATATGT<br>TAAAGATATGCGATAACTTCGTATAGCATAACATTATACGAAGTTATAG<br>TGACATTAG |
| oCR490 | AATGATTTAATTGCTGCGGTCTTTTGTCTGCTGTGCCTTCGAATTTA<br>TTTAAGTGCTTGATAACTTCGTATAATGTATGCTATACGAAGTTATTAT<br>ATTTATG    |
| oCR491 | TAGAGACATAGCAAGAGAGTTAAAAGGTATACGTAAAGAGTTACAAA<br>AGCGAAACGAAACATAACTTCGTATAGCATAACATTATACGAAGTTATA<br>GTGACATTAG |
| oCR492 | TTTTCTTTATCGGCTAATACTGCCGACCTTACGCTGTCTAAGTTTGCA<br>TCAATAATAACTATAACTTCGTATAATGTATGCTATACGAAGTTATTAT<br>ATTTATG   |
| oCR493 | TAAAGAAGAATTAAGTCGTATGAAGCAGAAAGAAAAAGAGAAAC<br>AAGAAGCTGTTGAATAACTTCGTATAGCATAACATTATACGAAGTTATA<br>GTGACATTAG    |
| oCR494 | TGTTTCGCGTTCATATTCAGCGATTTGATCTTTGTTCAATTTTTGCTAATC<br>GTTTAGCTTCAATAACTTCGTATAATGTATGCTATACGAAGTTATTATA<br>TTTATG |
| oCR495 | AGGTGAAGGTCAAAAAATCGAAACATCTAAAGCTACATGGGTTAATG<br>CTACTATGAGAGCATAACTTCGTATAGCATAACATTATACGAAGTTATA<br>GTGACATTAG |
| oCR496 | TGTGAATAAGTGTAATTCAAAAATTCTTTTGTACAGGTAAGATAACC<br>CCTAATTTAAACATAACTTCGTATAATGTATGCTATACGAAGTTATTAT<br>ATTTATG    |
| oCR497 | AAATAATCATCCTCCTAAGTACAAGCTTAA                                                                                     |
| oCR498 | GACGTGGTTTAACCCGGGTAAGTAACT                                                                                        |
| oCR499 | TTAAGCTTGTACTTAGGAGGATGATTATTTATGAACGAAAAACAAAAG<br>AGATTCGC                                                       |
| oCR500 | AGTTACTAGTTACCCGGGTTAAACCACGTCTTAACTTCTCCTGGTAC<br>TGAATCTGT                                                       |
| oCR501 | TTAAGCTTGTACTTAGGAGGATGATTATTTATGTTAAAAGTAAACGAA<br>TTTGAAACAGAT                                                   |
| oCR502 | TTAAGCTTGTACTTAGGAGGATGATTATTTTTGCCTAACAAAAACACT<br>CAAGAATATTG                                                    |
| oCR503 | TTAAGCTTGTACTTAGGAGGATGATTATTTATGGAACAAACACAAAA<br>TTAAAATTAAT                                                     |



|        |                                                                                                           |
|--------|-----------------------------------------------------------------------------------------------------------|
| oCR504 | TTAAGCTTGTACTTAGGAGGATGATTATTTATGACGAAAGTTAAATTA<br>AACTTTAACAAA                                          |
| oCR505 | AGTTACTAGTTACCCGGGTAAACCACGTCCTATAATCCTAGAGATTT<br>TATTGTGTCAAC                                           |
| oCR515 | TTAAGCTTGTACTTAGGAGGATGATTATTTATGGAACAAACACAAAA<br>TTAAAATTAAT                                            |
| oCR516 | AGTTACTAGTTACCCGGGTAAACCACGTCCTAAACTTCTCCTGGTAC<br>TGAATC                                                 |
| oCR517 | TTAAGCTTGTACTTAGGAGGATGATTATTTATGGAACAAACACAAAA<br>TTAAAATTAAT                                            |
| oCR518 | AGTTACTAGTTACCCGGGTAAACCACGTCCTAAACTTCTCCTGGAAC<br>TGAAG                                                  |
| oCR519 | TTAAGCTTGTACTTAGGAGGATGATTATTTATGGAACAAACACAAAA<br>TTAAAATTAAT                                            |
| oCR520 | AGTTACTAGTTACCCGGGTAAACCACGTCCTAAACTTCTCCTGGAAC<br>TGAATCTG                                               |
| oCR521 | TTAAGCTTGTACTTAGGAGGATGATTATTTATGGCAACTCCAACATAC<br>AC                                                    |
| oCR522 | AGTTACTAGTTACCCGGGTAAACCACGTCCTATTCAGTTGGTTAAG<br>CGTTGC                                                  |
| oCR523 | TTAAGCTTGTACTTAGGAGGATGATTATTTATGCGAAATTTAAAAAT<br>GACAATGAATT                                            |
| oCR524 | AGTTACTAGTTACCCGGGTAAACCACGTCCTTAGCTGGGTAATGGAC<br>CTGTA                                                  |
| oCR589 | ATTTTAAAAATATCCCACTTTATCCAATTTTCGT                                                                        |
| oCR590 | ATATATTTATGTTACAGTAATATTGACTTTTAAAAAAGG                                                                   |
| oCR591 | ACGAAAATTGGATAAAGTGGGATATTTTAAAATCTGAAATAACCTTC<br>ACGCC                                                  |
| oCR592 | ATTTAATTTTAATTTTGTGTTTGTTCATTTAAATGCCTCCGTTAATTT<br>TTAATAATTC                                            |
| oCR593 | ATGGAACAAACACAAAAATTAATTAAT                                                                               |
| oCR594 | TTAAACTTCTCCTGGTACTGAATCTGTTTT                                                                            |
| oCR595 | AAAACAGATTCAGTACCAGGAGAAGTTTAATAACAATTAGGAGTGG<br>TAACATGC                                                |
| oCR596 | CCTTTTTTAAAAGTCAATATTACTGTAACATAAATATATGTTGTAGCGT<br>TTAACTGCAAC                                          |
| oCR597 | AAACACTTTTTGGGCTGATAAACAGGTGCTTACG                                                                        |
| oCR598 | AAAACGTAAGCACCTGGTTTATCAGCCCAAAAAGT                                                                       |
| oCF.36 | GCTTTTTCAGATTAGGAGTGATCGTTAAATTTATACTGCAATCG                                                              |
| oCF.37 | ATTTAACGATCACTCCTAATCTGAAAAAGCCTCTAATAATTCTTCAAG<br>GTTTATTTAATAAAAAGCATATATTAATAATGGAGGGACTTAGAGTTG<br>G |
| oCF.38 | CCTCCATTTTAAATATATGCTTTTATTAATAAATAAATTTCTTCGTGATCA<br>TG                                                 |
| oCF.39 |                                                                                                           |
| oCF.40 | CAAAATAATTCATGGGGGAGTGATCGTTAAATTTATACTGCAATCG                                                            |

|         |                                                                                                |
|---------|------------------------------------------------------------------------------------------------|
| oCF.41  | CGATCACTCCCCCATGAATTATTTTGTTTTTTTTATTTCAATTAC                                                  |
| oCF.42  | GGAGGATGATTATTTTGAAGTACCCTATACGACAAGTAGC                                                       |
| oCF.43  | GTATAGGGTACTTCAAAAATAATCATCCTCCTAAGTACAAGCTTAATT<br>G                                          |
| oCF.70  | TCTCACCATCACCATCACCATGGTTCTTCTATGACTATAGATAAGAAA<br>AAATTCATTGAAAAATATGTAAAAGCTTTAGAAAGTAATACA |
| oCF.72  | TCTCACCATCACCATCACCATGGTTCTTCTTTGAAGTACCCTATACGA<br>CAAGTAGC                                   |
| oCF.78  | GATCATGATGGTGATTATAAGGATCATGATATCGACTACAAAGACGAT<br>GACGACAAGTTGAAGTACCCTATACGACAAGTAGC        |
| oCF.84  | CAATTATCTACAGCTAAAAACGAAGATGGCACACCTGT                                                         |
| oCF.85  | CTTCGTTTTTAGCTGTAGATAATTGTGCAGTTTCATCGATTTTGTATTC<br>AATTAATTGAG                               |
| oCF.86  | CATGGTGATGGTGATGGTGAGAAGAACCATAAATAATCATCCTCCT<br>AAGTACAAGCTTAATTG                            |
| oCF.87  | GTCTTTGTAGTCGATATCATGATCCTTATAATCACCATCATGATCCTT<br>ATAATCCATAAATAATCATCCTCCTAAGTACAAGCTTAATTG |
| oCF.90  | GATAATGTCCAGAAGGTGCATAGAAAGCGTGAGAAACAG                                                        |
| oCF.91  | CTTTCTATCGACCTTCTGGACATTATCCTGTACAACATC                                                        |
| oCF.97  | CTTGAATGTTCATAAATAATCATCCTCCTAAGTACAAGCTTAATTG                                                 |
| oCF.98  | ACTTAGGAGGATGATTATTTATGAACATTCAAGAAGCAACTAAGATAG<br>C                                          |
| oCF.99  | TAAACCACGTCCTATAATTGCTTCAATAATTCCTGGTCTCTAG                                                    |
| oCF.100 | ATTATTGAAGCAATTATAGGACGTGGTTTAAACCCGGGTAA                                                      |
| oCF.101 | TCTCACCATCACCATCACCATGGTTCTTCTATGAACATTCAAGAAGCA<br>ACTAAGATAGC                                |
| oCF.102 | AAGTCTATGATATTGCTATTTTCTCATAGTACAAAAGATAAGAAGACAG<br>TTG                                       |
| oCF.103 | TTTTGTA CTATGAGAAATAGCAATATCATAGACTTTTTGAGATTGAATA<br>TTCTTATT                                 |
| oCF.104 | GGGTAGTTTTCAAATAGAATACTTTGAAAATCTAAAAAACCTATATA<br>TATAGTAGAGTCTCTTGAAGAATT                    |
| oCF.105 | GATTTTCAAAGTATTCTATTTGAAAACCTAACCCAATCAGATTGAACTG<br>AA                                        |
| oCF.106 | GCGTAAACAGCAATTTTCATATAAATACTCTGAAGCAAAGATTTAAG<br>A                                           |
| oCF.107 | AGAGTATTTATATGAAATTGCTGTTTTACGCGCCA ACTCTAAG                                                   |
| oCF.108 | TGGATTGATTGGCAAATAGAATACTCAGTTAAACAAATGAAAAGAGG                                                |
| oCF.109 | CTGAGTATTCTATTTGCCAATCAATCCAATTACTTTCTTTTCATATTAGG                                             |
| oCF.110 | TCTCACCATCACCATCACCATGGTTCTTCTTAAGAGTGATCGTTAAAT<br>TTATACTGCAATCG                             |
| oCF.111 | CATGGTGATGGTGATGGTGAGAAGAACCCTTTTCTTCTACAGATATTAT<br>AATTCGTTGCTTTTT                           |
| oCF.112 | GGACTTAGAGTTGGCGCGTAAAACATTTATTTTCATATAAATAC                                                   |
| oCF.113 | TACGCGCCA ACTCTAAGTCCCTCCATTTTTAATATATCTAATCTG                                                 |

|         |                                                                                                 |
|---------|-------------------------------------------------------------------------------------------------|
| oCF.114 | GTCTTTGTAGTCGATATCATGATCCTTATAATCACCATCATGATCCTT<br>ATAATCTTTTCTTCTACAGATATTATAATTCGTTGCTTTTT   |
| oCF.115 | GATCATGATGGTGATTATAAGGATCATGATATCGACTACAAAGACGAT<br>GACGACAAGTAAGAGTGATCGTTAAATTTATACTGCAATCG   |
| oCF.116 | TCTCACCATCACCATCACCATGGTTCTTCTTAAGAGTGATCGTTAAAT<br>TTATACTGCAATCG                              |
| oCF.117 | CATGGTGATGGTGATGGTGAGAAGAACCCTTTTCTTCTACAGATATTAT<br>AATTCGTTGCTTTTT                            |
| oCF.126 | CAGGTGCTTACAAAGTAGGTGAAGGTCAAAAAATCGAAAC                                                        |
| OCF.127 | CTTCACCTACTTTGTAAGCACCTGGTTTATCAGCC                                                             |
| oCF.136 | TGTGAGCGGATAACAATTATATATTAATAAATGGAGGGACTTAGAGTTG<br>G                                          |
| oCF.137 | CCATTTTAAATATATAATTGTTATCCGCTCACAATTCCAC                                                        |
| oCF.160 | GTCTTTGTAGTCGATATCATGATCCTTATAATCACCATCATGATCCTT<br>ATAATCCATGCTTTTATTAATAAATAAATTCTTCGTGATCATG |

**Supplementary Sequences 1.** DNA sequences of *mhp* genes from escaper Φ80α-vir phages that avoid Sau-Thoeris immunity. The sequence of the codon for residue V273 is shown in red.

#### Escaper 1

ATGGAACAAACACAAAAATTAATAATTAATTTGCAACATTTTGGCAGTAACAATGTTA  
AACCGCAAGTATTTAACCCCTGATAATGTAATGATGCACGAAAAGAAAGATGGCACG  
TTGATGAATGAATTCACAACGCCCATCTTACAAGAGGTTATGGAAAACCTCTAAAATT  
ATGCAATTAGGTAAGTACGAACCAATGGAAGGTAAGGTTACTGAGAAGAAGTTTACTTTTTG  
GGCTGATAAACAGGTGCTTACTGGGTAGGTGAAGGTCAAAAAATCGAAACATCTA  
AAGCTACATGGGTTAATGCTACTATGAGAGCGTTTAAATTAGGGGTTATCTTACCTG  
TAACAAAAGAATTCTTGAATTATACTTATTCACAATTCTTTGAAGAAATGAAGCCTAT  
GATTGCTGAAGCATTCTATAAAAAGTTTGATGAAGCGGGTATTTTGAATCAAGGTAA  
CAATCCATTCGGTAAATCAATTGCGCAATCAATTGAAAAACTAATAAGGTTATTAA  
AGGTGACTTCACACAAGATAACATTATTGATTTAGAGGCATTACTTGAAGATGACGA  
ATTAGAAGCAAATGCGTTTATCTCAAAAACACAAAACAGAAGCTTGTTACGTAAAAT  
TGTAGATCCTGAAACGAAAGAACGTATTTATGACCGTAACAGTGATTCGTTAGACG  
GTCTACCTGTGGTTAACCTTAAATCAAGCAACTTAAAACGTGGTGAATTAATCACTG  
GTGACTTCGACAAATTGATTTATGGTATCCCTCAATTAATCGAATACAAAATCGATG  
AACTGCACAATTATCTACAGCTAAAACGAAGATGGCACACCTGTAACTTGTTTG  
AACAAGACATGGTGGCATTACGTGCAACTATGCATGTAGCATTGCATATCGCTGAT  
GATAAAGCGTTTGCTAAGTTAGTTCCTGCTGACAAAAGAACAGATTCAGTTCCAGG  
AGAAGTTTAA

#### Escaper 2

ATGGAACAAACACAAAAATTAATAATTAATTTGCAACATTTTGGCAGTAACAATGTTA  
AACCGCAAGTATTTAACCCCTGATAATGTAATGATGCACGAAAAGAAAGATGGCACG  
TTGATGAATGAATTCACAACGCCCATCTTACAAGAGGTTATGGAAAACCTCTAAAATT  
ATGCAATTAGGTAAGTACGAACCAATGGAAGGTAAGGTTACTGAGAAGAAGTTTACTTTTTG  
GGCTGATAAACAGGTGCTTACTGGGTAGGTGAAGGTCAAAAAATCGAAACATCTA  
AAGCTACATGGGTTAATGCTACTATGAGAGCGTTTAAATTAGGGGTTATCTTACCTG  
TAACAAAAGAATTCTTGAATTATACTTATTCACAATTCTTTGAAGAAATGAAGCCTAT  
GATTGCTGAAGCATTCTATAAAAAGTTTGATGAAGCGGGTATTTTGAATCAAGGTAA  
CAATCCATTCGGTAAATCAATTGCGCAATCAATTGAAAAACTAATAAGGTTATTAA  
AGGTGACTTCACACAAGATAACATTATTGATTTAGAGGCATTACTTGAAGATGACGA  
ATTAGAAGCAAATGCGTTTATCTCAAAAACACAAAACAGAAGCTTGTTACGTAAAAT  
TGTAGATCCTGAAACGAAAGAACGTATTTATGACCGTAACAGTGATTCGTTAGACG  
GTCTACCTGTGGTTAACCTTAAATCAAGCAACTTAAAACGTGGTGAATTAATCACTG  
GTGACTTCGACAAATTGATTTATGGTATCCCTCAATTAATCGAATACAAAATCGATG  
AACTGCACAATTATCTACAGCTAAAACGAAGATGGCACACCTGTAACTTGTTTG  
AACAAGACATGGTGGCATTACGTGCAACTATGCATGTAGCATTGCATATCGCTGAT  
GATAAAGCGTTTGCTAAGTTAGTTCCTGCTGACAAAAGAACAGATTCAGTTCCAGG  
AGAAGTTTAA

### Escaper 3

ATGGAACAAACACAAAAATTTAAATTTGCAACATTTTGGCAGTAACAATGTTA  
AACCGCAAGTATTTAACCCCTGATAATGTAATGATGCACGAAAAGAAAGATGGCACG  
TTGATGAATGAATTCACAACGCCCATCTTACAAGAGGTTATGGAAAACCTCTAAAATT  
ATGCAATTAGGTAAGTACGAACCAATGGAAGGTAAGTACTGAGAAGAAGTTTACTTTTTG  
GGCTGATAAACCAGGTGCTTACTGGGTAGGTGAAGGTCAAAAAATCGAAACATCTA  
AAGCTACATGGGTTAATGCTACTATGAGAGCGTTTAAATTAGGGGTTATCTTACCTG  
TAACAAAAGAATTCTTGAATTATACTTATTCACAATTCTTTGAAGAAATGAAGCCTAT  
GATTGCTGAAGCATTCTATAAAAAGTTTGATGAAGCGGGTATTTTGAATCAAGGTAA  
CAATCCATTCGGTAAATCAATTGCGCAATCAATTGAAAAACTAATAAGGTTATTAA  
AGGTGACTTCACACAAGATAACATTATTGATTTAGAGGCATTACTTGAAGATGACGA  
ATTAGAAGCAAATGCGTTTATCTCAAAAACACAAAACAGAAGCTTGTTACGTAAAAT  
TGTAGATCCTGAAACGAAAGAACGTATTTATGACCGTAACAGTGATTCGTTAGACG  
GTCTACCTGTGGTTAACCTTAAATCAAGCAACTTAAAACGTGGTGAATTAATCACTG  
GTGACTTCGACAAATTGATTTATGGTATCCCTCAATTAATCGAATACAAAATCGATG  
AACTGCACAATTATCTACAGCTAAAAACGAAGATGGCACACCTGTAACTTGTTTG  
AACAAGACATGGTGGCATTACGTGCAACTATGCATGTAGCATTGCATATCGCTGAT  
GATAAAGCGTTTGCTAAGTTAGTTCCTGCTGACAAAAGAACAGATTCAGTTCCAGG  
AGAAGTTTAA

### Escaper 4

ATGGAACAAACACAAAAATTTAAATTTGCAACATTTTGGCAGTAACAATGTTA  
AACCGCAAGTATTTAACCCCTGATAATGTAATGATGCACGAAAAGAAAGATGGCACG  
TTGATGAATGAATTCACAACGCCCATCTTACAAGAGGTTATGGAAAACCTCTAAAATT  
ATGCAATTAGGTAAGTACGAACCAATGGAAGGTAAGTACTGAGAAGAAGTTTACTTTTTG  
GGCTGATAAACCAGGTGCTTACTGGGTAGGTGAAGGTCAAAAAATCGAAACATCTA  
AAGCTACATGGGTTAATGCTACTATGAGAGCGTTTAAATTAGGGGTTATCTTACCTG  
TAACAAAAGAATTCTTGAATTATACTTATTCACAATTCTTTGAAGAAATGAAGCCTAT  
GATTGCTGAAGCATTCTATAAAAAGTTTGATGAAGCGGGTATTTTGAATCAAGGTAA  
CAATCCATTCGGTAAATCAATTGCGCAATCAATTGAAAAACTAATAAGGTTATTAA  
AGGTGACTTCACACAAGATAACATTATTGATTTAGAGGCATTACTTGAAGATGACGA  
ATTAGAAGCAAATGCGTTTATCTCAAAAACACAAAACAGAAGCTTGTTACGTAAAAT  
TGTAGATCCTGAAACGAAAGAACGTATTTATGACCGTAACAGTGATTCGTTAGACG  
GTCTACCTGTGGTTAACCTTAAATCAAGCAACTTAAAACGTGGTGAATTAATCACTG  
GTGACTTCGACAAATTGATTTATGGTATCCCTCAATTAATCGAATACAAAATCGATG  
AACTGCACAATTATCTACAGCTAAAAACGAAGATGGCACACCTGTAACTTGTTTG  
AACAAGACATGGTGGCATTACGTGCAACTATGCATGTAGCATTGCATATCGCTGAT  
GATAAAGCGTTTGCTAAGTTAGTTCCTGCTGACAAAAGAACAGATTCAGTTCCAGG  
AGAAGTTTAA

### Wild-type

ATGGAACAAACACAAAAATTTAAATTTGCAACATTTTGGCAGTAACAATGTTA  
AACCGCAAGTATTTAACCCCTGATAATGTAATGATGCACGAAAAGAAAGATGGCACG  
TTGATGAATGAATTCACAACGCCCATCTTACAAGAGGTTATGGAAAACCTCTAAAATT

ATGCAATTAGGTAAGTACGAACCAATGGAAGGTTACTGAGAAGAAGTTTACTTTTTG  
GGCTGATAAACCAGGTGCTTACTGGGTAGGTGAAGGTCAAAAAATCGAAACATCTA  
AAGCTACATGGGTTAATGCTACTATGAGAGCGTTTAAATTAGGGGTTATCTTACCTG  
TAACAAAAGAATTCTTGAATTATACTTATTCACAATTCTTTGAAGAAATGAAGCCTAT  
GATTGCTGAAGCATTCTATAAAAAGTTTGATGAAGCGGGTATTTTGAATCAAGGTAA  
CAATCCATTCGGTAAATCAATTGCGCAATCAATTGAAAAACTAATAAGGTTATTAA  
AGGTGACTTCACACAAGATAACATTATTGATTTAGAGGCATTACTTGAAGATGACGA  
ATTAGAAGCAAATGCGTTTATCTCAAAAACACAAAACAGAAGCTTGTTACGTAAAAT  
TGTAGATCCTGAAACGAAAGAACGTATTTATGACCGTAACAGTGATTCGTTAGACG  
GTCTACCTGTGGTTAACCTTAAATCAAGCAACTTAAAACGTGGTGAATTAATCACTG  
GTGACTTCGACAAATTGATTTATGGTATCCCTCAATTAATCGAATACAAAATCGATG  
AACTGCACAATTATCTACAGTTAAAAACGAAGATGGCACACCTGTAACTTGTTTG  
AACAGACATGGTGGCATTACGTGCAACTATGCATGTAGCATTGCATATCGCTGAT  
GATAAAGCGTTTGCTAAGTTAGTTCCTGCTGACAAAAGAACAGATTTCAGTTCCAGG  
AGAAGTTTAA
